# Supplementary material for: Thermo-responsive single-chain cyclized/knotted polymers for cell encapsulation
Source: Royal Society of Chemistry journal article supplement (doi:10.1039/d5ma00621j), 2026-01-01
Supplement: d5ma00621j1.pdf [file d5ma00621j1.pdf]

Supporting Information

**Thermo-Responsive Single-Chain Cyclized/Knotted Polymers for Cell  
Encapsulation**

Zhi Dou<sup>1#</sup>, Liangliang He<sup>1#</sup>, Wenxing Zhao<sup>1</sup>, Xiaoping Wang<sup>1</sup>, Hongyan Wang<sup>1</sup>, Jie Lu<sup>1</sup>, Chao Wang<sup>2</sup>, Liqiang Yang<sup>1\*</sup>

<sup>1</sup>Department of Pain Management, Xuanwu Hospital, Capital Medical University, Beijing, 100053, China

<sup>2</sup>Department of Pain Management, Xiong'an Xuanwu Hospital, Hebei, 070001, China

<sup>#</sup>First author: Zhi Dou

Co- First author: Liangliang He

\*Corresponding authors: Liqiang Yang, Department of Pain Management, Xuanwu Hospital, Capital Medical University, Beijing, 100053, China. Email: yangliqiangxwpain@outlook.com.

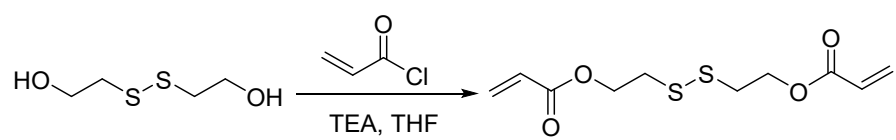

**Figure S1.** Reaction scheme for the synthesis of DSDA

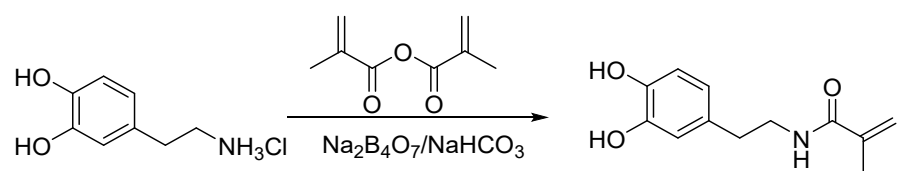

**Figure S2.** Reaction scheme for the synthesis of DMA

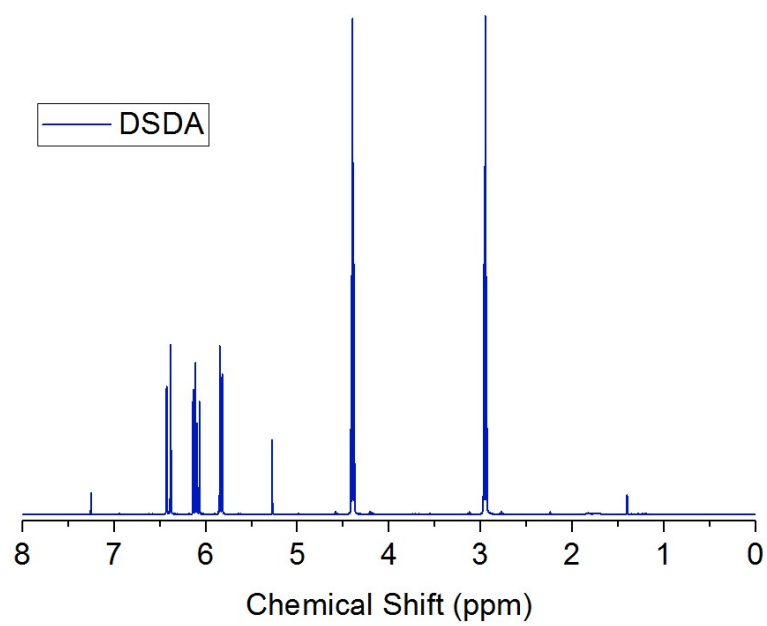

**Figure S3.**  $^1\text{H}$  NMR spectrum of DSDA

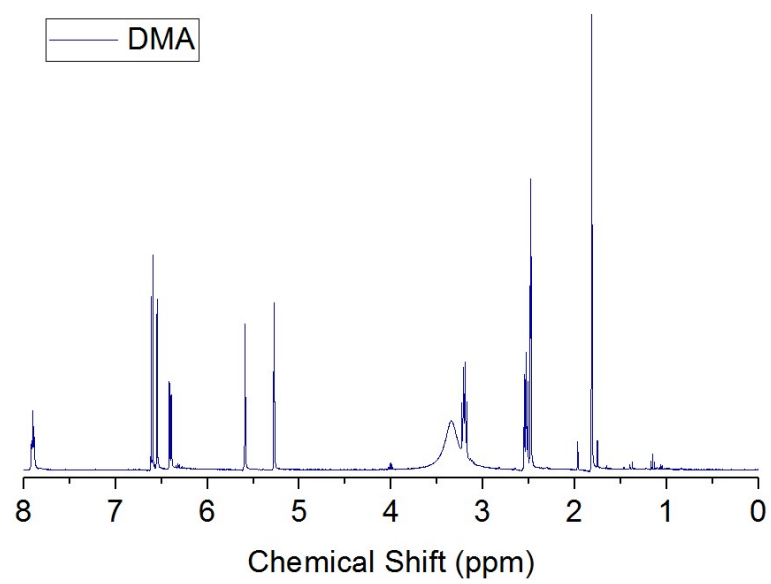

**Figure S4.**  $^1\text{H}$  NMR spectrum of DMA

---

**Table S1.** Monomer combination and feed ratio for the synthesis of SCKPs

| <b>PEGDA700</b><br><b>(mole)</b> | <b>PEGDA575</b><br><b>(mole)</b> | <b>DEGDA</b><br><b>(mole)</b> | <b>DSDA</b><br><b>(mole)</b> | <b>DMA</b><br><b>(mole)</b> |
|----------------------------------|----------------------------------|-------------------------------|------------------------------|-----------------------------|
| <b>50</b>                        | 50                               | /                             | /                            | /                           |
| <b>25</b>                        | 75                               | /                             | /                            | /                           |
| <b>100</b>                       | /                                | /                             | /                            | /                           |
| /                                | 75                               | 25                            | /                            | /                           |
| /                                | 50                               | 50                            | /                            | /                           |
| /                                | 50                               | 30                            | 20                           | /                           |
| /                                | 40                               | 30                            | 20                           | 10                          |
| /                                | 50                               | 20                            | 20                           | 10                          |
| /                                | 70                               | 10                            | 10                           | 10                          |

---

**Table S2.** LCST of SCKP composed of DSDA, DMA, DEGDA and PEGDA575 at different feed ratios

| <b>DSDA</b><br><b>(mol)</b> | <b>DMA</b><br><b>(mol)</b> | <b>DEGDA</b><br><b>(mol)</b> | <b>PEGDA575</b><br><b>(mol)</b> | <b>LCST</b><br><b>(°C)</b> |
|-----------------------------|----------------------------|------------------------------|---------------------------------|----------------------------|
| <b>20</b>                   | 10                         | 30                           | 40                              | < 23                       |
| <b>20</b>                   | 10                         | 20                           | 50                              | < 23                       |

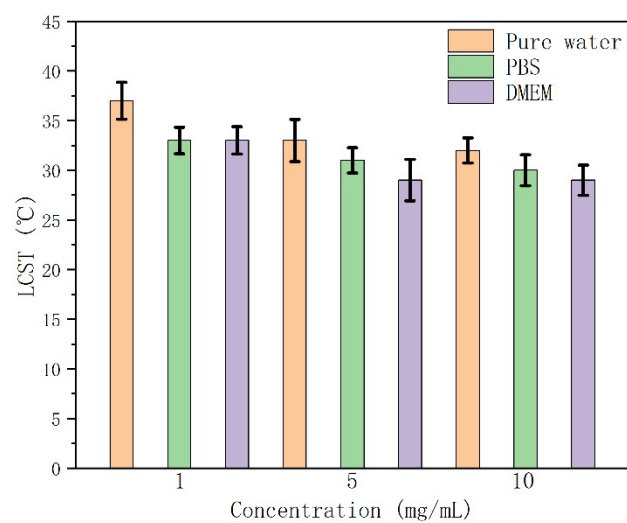

**Figure S5.** LCST of SCKP composed of DSDA, DEGDA and PEGDA575 at a feed ratio of 20:20:50 in pure water, PBS and DMEM at the concentration of 1 mg/mL, 5 mg/mL and 10 mg/mL.

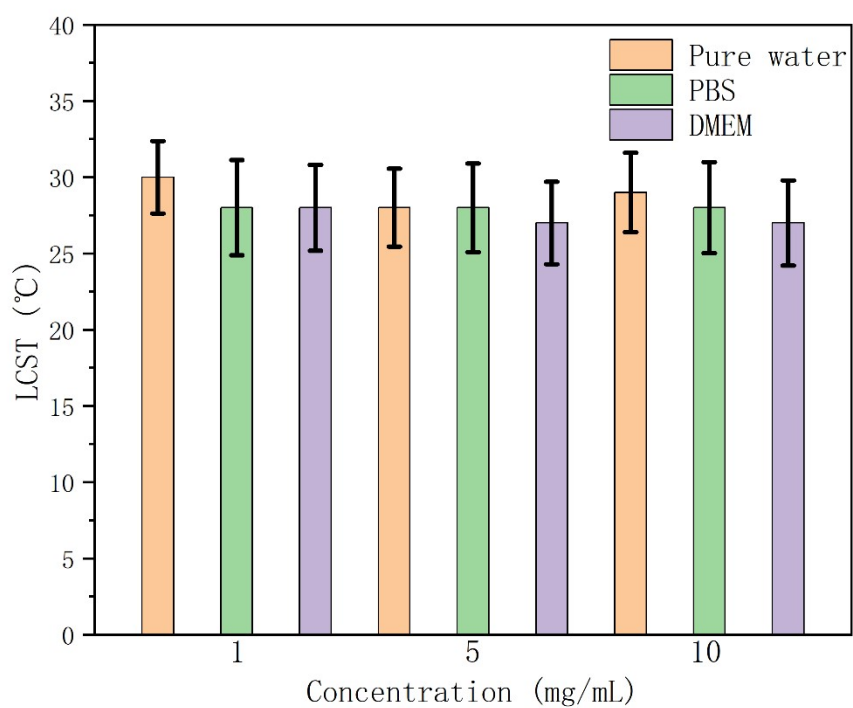

**Figure S6.** LCST of SCKP composed of DEGDA and PEGDA575 at a feed ratio of 50:50 in pure water, PBS and DMEM at the concentration of 1 mg/mL, 5 mg/mL and 10 mg/mL.

---

**Table S3.** LCST of SCKP composed of DSDA, DEGDA and PEGDA575 at a feed ratio of 20:30:50 in pure water, PBS and DMEM at the concentration of 1 mg/mL, 5 mg/mL and 10 mg/mL

| Concentration<br>(mg/mL) | Solvent            |             |              |
|--------------------------|--------------------|-------------|--------------|
|                          | Pure water<br>(°C) | PBS<br>(°C) | DMEM<br>(°C) |
| 1                        | 30                 | 28          | 28           |
| 5                        | 28                 | 28          | 27           |
| 10                       | 29                 | 27          | 29           |

---

**Table S4.** LCST of SCKP composed of DEGDA and PEGDA575 at a feed ratio of 50:50 in pure water, PBS and DMEM at the concentration of 1 mg/mL, 5 mg/mL and 10 mg/mL

| Concentration<br>(mg/mL) | Solvent            |             |              |
|--------------------------|--------------------|-------------|--------------|
|                          | Pure water<br>(°C) | PBS<br>(°C) | DMEM<br>(°C) |
| 1                        | 37                 | 33          | 33           |
| 5                        | 33                 | 31          | 29           |
| 10                       | 32                 | 30          | 29           |
